# Supplementary material
Source: MDPI journal article supplement (https://www.mdpi.com/2379-139X/7/4/76)
Supplement: s1 [file s1]

**Table S1.** Correlation between OCT parameters and disease severity, disease duration and visual function

|                 | Macula         |              | RNFL            |                |               |                 |               |
|-----------------|----------------|--------------|-----------------|----------------|---------------|-----------------|---------------|
|                 | Average        | Foveal       | Average         | Superior       | Nasal         | Inferior        | Temporal      |
| <b>SARA</b>     | r(47)=-0.320   | r(45)=0.080  | r(38)=-0.56     | r(38)=-0.42    | r(38)= -0.308 | r(38)=-0.520    | r(38)=-0.399  |
|                 | <b>p=0.03</b>  | p=0.6        | <b>p=0.0002</b> | <b>p=0.008</b> | p=0.06        | <b>p=0.0008</b> | <b>p=0.01</b> |
| <b>Disease</b>  | rs = -0.286    | rs = -0.259  | rs = -0.266     | rs = -0.165    | rs = -0.057   | rs = -0.195     | rs = -0.137   |
| <b>duration</b> | p=0.051        | p=0.09       | p=0.1           | p=0.3          | p=0.7         | p=0.2           | p=0.4         |
| <b>BCVA</b>     | r(47)= -0.391  | r(45)=-0.015 | r(38)=-0.396    | r(38)=-0.292   | r(38)= -0.089 | r(38)=-0.44     | r(38)=-0.374  |
|                 | <b>p=0.006</b> | p=0.9        | <b>p=0.01</b>   | p=0.08         | p=0.6         | <b>p=0.005</b>  | <b>p=0.02</b> |

Numbers in bold p-value &lt; 0.05.

**Table S2.** Baseline, follow-up and expected follow-up RNFL thickness in FRDA patients.

| Patient | Baseline RNFL thickness | Follow up RNFL thickness | Expected Follow Up RNFL thickness * | Difference | Time from baseline(months) |
|---------|-------------------------|--------------------------|-------------------------------------|------------|----------------------------|
| 2       | 94                      | 93                       | 93.67                               | 0.33       | 12                         |
| 3       | 114                     | 106.5                    | 113.37                              | 6.87       | 23                         |
| 4       | 81                      | 80                       | 80.175                              | 0.18       | 30                         |
| 5       | 74                      | 73                       | 73.175                              | 0.18       | 30                         |
| 6       | 94                      | 93                       | 93.67                               | 0.33       | 33                         |
| 7       | 108                     | 106                      | 107.37                              | 1.37       | 23                         |
| 10      | 104                     | 90.5                     | 103.37                              | 12.87      | 23                         |
| 15      | 55                      | 44                       | 54.2                                | 10.2       | 29                         |
| 18      | 107                     | 103                      | 105.68                              | 2.68       | 48                         |
| 21      | 81                      | 72.5                     | 80.18                               | 7.68       | 30                         |
| 23      | 74                      | 66                       | 73.2                                | 7.18       | 30                         |
| 25      | 97                      | 95.5                     | 96.18                               | 0.68       | 30                         |
| 33      | 90.5                    | 90                       | 90.12                               | 0.12       | 14                         |
| 34      | 96                      | 94                       | 95.56                               | 1.56       | 16                         |
| 36      | 87                      | 85.5                     | 86.15                               | 0.65       | 31                         |
| 37      | 76                      | 67                       | 75.18                               | 8.18       | 30                         |
| 42      | 83                      | 82.5                     | 82.1                                | -          | 33                         |
| 43      | 84.5                    | 83                       | 83.73                               | 0.73       | 28                         |
| 44      | 88                      | 86.5                     | 87.23                               | 0.73       | 28                         |

\* Minimal thinning reported in healthy subjects (0.33  $\mu\text{m}/\text{year}$ ).
